# Supplementary material for: TiO2/porous carbon as a new nanocomposite and catalyst for the preparation of 4H-pyrimido[2,1-b]benzimidazoles
Source: Royal Society of Chemistry journal article supplement (doi:10.1039/d3ra00367a), 2023-01-01

## Supporting Information

### **TiO<sub>2</sub>/porous carbon as a new nanocomposite and catalyst for the preparation of 4H-pyrimido[2,1-*b*]benzimidazoles**

Zahra Jalilian,<sup>a</sup> Ahmad Reza Moosavi-Zare,<sup>\*b</sup> Mohammad Ghadermazi,<sup>\*a</sup> Hamid  
Goudarziafshar<sup>b</sup>

<sup>a</sup>*Department of Chemistry, University of Kurdistan, Sanandaj, P.O. Box 66135-416, Iran.*

<sup>b</sup>*Department of Chemical Engineering, Hamedan University of Technology, Hamedan, 65155,  
Iran.*

\*Corresponding author. E-mail addresses: moosavizare@yahoo.com and  
mghadermazi@yahoo.com.

**Ethyl 2-methyl-4-(p-tolyl)-4,10-dihydrobenzo[4,5]imidazo[1,2-a]pyrimidine-3-carboxylate (2)**

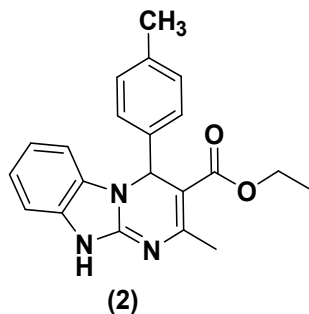

Yellow Solid; M.p: 258-260 °C; Yield: 92%; IR (KBr,  $\text{cm}^{-1}$ ): 3238, 3162, 3106, 2934, 1698, 1659, 1621, 852, 474;  $^1\text{H-NMR}$ : (250 MHz,  $\text{DMSO-}d_6$ ):  $\delta$  (ppm) 1.12 (t,  $J=7.50$  Hz, 3H), 2.43 (s, 3H), 3.62 (s, 3H), 3.98 (q,  $J=7.50$  Hz, 2H), 6.35 (s, 1H), 6.77 (d,  $J=7.50$  Hz, 2H), 6.88-7.04 (m, 2H), 7.20-7.33 (m, 4H), 10.77, (s, 1H);  $^{13}\text{CNMR}$ : (62.5 MHz,  $\text{DMSO-}d_6$ ):  $\delta$  (ppm); 14.50, 19.01, 55.37, 55.77, 59.74, 98.61, 110.31, 114.07, 117.15, 120.50, 122.10, 128.72, 131.98, 134.60, 142.76, 146.06, 146.55, 159.07, 165.67

**Ethyl 4-(2,5-dimethoxyphenyl)-2-methyl-4,10-dihydrobenzo[4,5]imidazo[1,2-a]pyrimidine-3-carboxylate (4)**

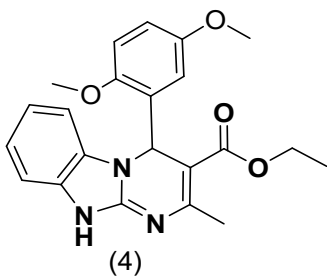

Yellow Solid; M.p: 255-258 °C; Yield: 90 %; IR (KBr,  $\text{cm}^{-1}$ ): 3231, 3100,3170,2974,2839, 1658, 1617, 1575, 828,701;  $^1\text{H-NMR}$ : (250 MHz,  $\text{DMSO-}d_6$ ):  $\delta$  (ppm) 1.07 (t,  $J=7.50$  Hz ,3H), 2.43(s, 3H), 3.61 (s, 3H), 3.70 (s, 3H), 3.94 (q,  $J=7.50$  Hz, 2H), 6.58 (s, 1H), 6.72 (d,  $J=7.50$  Hz, 1H), 6.83 (d,  $J=7.50$  Hz, 2H), 6.91-7.02 (m, 2H), 7.29 (d,  $J=7.50$ , 1H), 10.74 (s, 1H);  $^{13}\text{CNMR}$ : (62.5 MHz,  $\text{DMSO-}d_6$ ):  $\delta$  (ppm); 14.39, 18.99, 51.76, 55.65, 56.44, 59.55, 96.84, 109.76, 112.88, 113.51, 115.55, 117.04, 120.46, 121.99, 130.90, 132.26, 142.61, 146.30, 147.45, 151.14, 153.34, 165.68

**Ethyl 4-(3-chlorophenyl)-2-methyl-4,10-dihydrobenzo[4,5]imidazo[1,2-a]pyrimidine-3-carboxylate (10)**

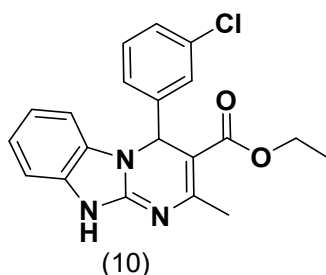

Yellow Solid; M.p: 245-247 °C; Yield: 97 %; IR (KBr,  $\text{cm}^{-1}$ ): :3275, 3258,32,19,3090,2955, 1661, 1642, 1606, 844, 529;  $^1\text{H-NMR}$ : (250 MHz,  $\text{DMSO-}d_6$ ):  $\delta$  (ppm)  $\delta$  (ppm) 1.12 (t,  $J=7.50$  Hz ,3H), 2.44 (s, 3H),4.00 (t,  $J=7.5$  Hz, 2H), 6.43 (s, 1H), 9.91-7.06 (m, 2H), 7.24-7.35 (m, 5H), 7.44(s, 1H), 10.89 (s, 1H);  $^{13}\text{CNMR}$ : (62.5 MHz,  $\text{DMSO-}d_6$ ):  $\delta$  (ppm); 14.42,19.10, 55.77, 59.88, 97.74, 110.29, 117.31, 120.79, 122.38, 126.09, 127.54, 128.21, 130.86, 131.83, 133.28, 142.65, 144.83, 145.83, 147.49, 165.45

**Ethyl 4-(4-(benzyloxy)phenyl)-2-methyl-4,10-dihydrobenzo[4,5]imidazo[1,2-a]pyrimidine-3-carboxylate**

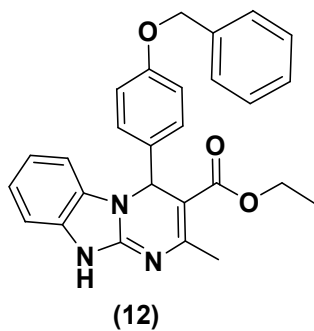

Yellow Solid; M.p: 261-263 °C; Yield: 95%; IR (KBr,  $\text{cm}^{-1}$ ): 3238, 3106, 3034, 2980, 1697, 1617, 1510, 830, 696;  $^1\text{H-NMR}$ : (250 MHz,  $\text{DMSO-}d_6$ ):  $\delta$  (ppm) 1.11 (t,  $J=7.50$  Hz, 3H), 2.43 (s, 3H), 3.98 (q,  $J=7.50$  Hz, 2H), 4.95 (s, 2H), 6.35 (s, 1H), 6.84-7.04 (m, 5H), 7.21-7.34 (m, 8H), 10.79 (s, NH);  $^{13}\text{CNMR}$ : (62.5 MHz,  $\text{DMSO-}d_6$ ):  $\delta$  (ppm); 14.51, 19.01, 55.74, 59.78, 69.63, 98.59, 110.34, 114.89, 117.17, 120.54, 122.14, 128.16, 128.28, 128.74, 128.83, 131.97, 134.84, 137.35, 142.74, 146.05, 146.62, 158.26, 165.69

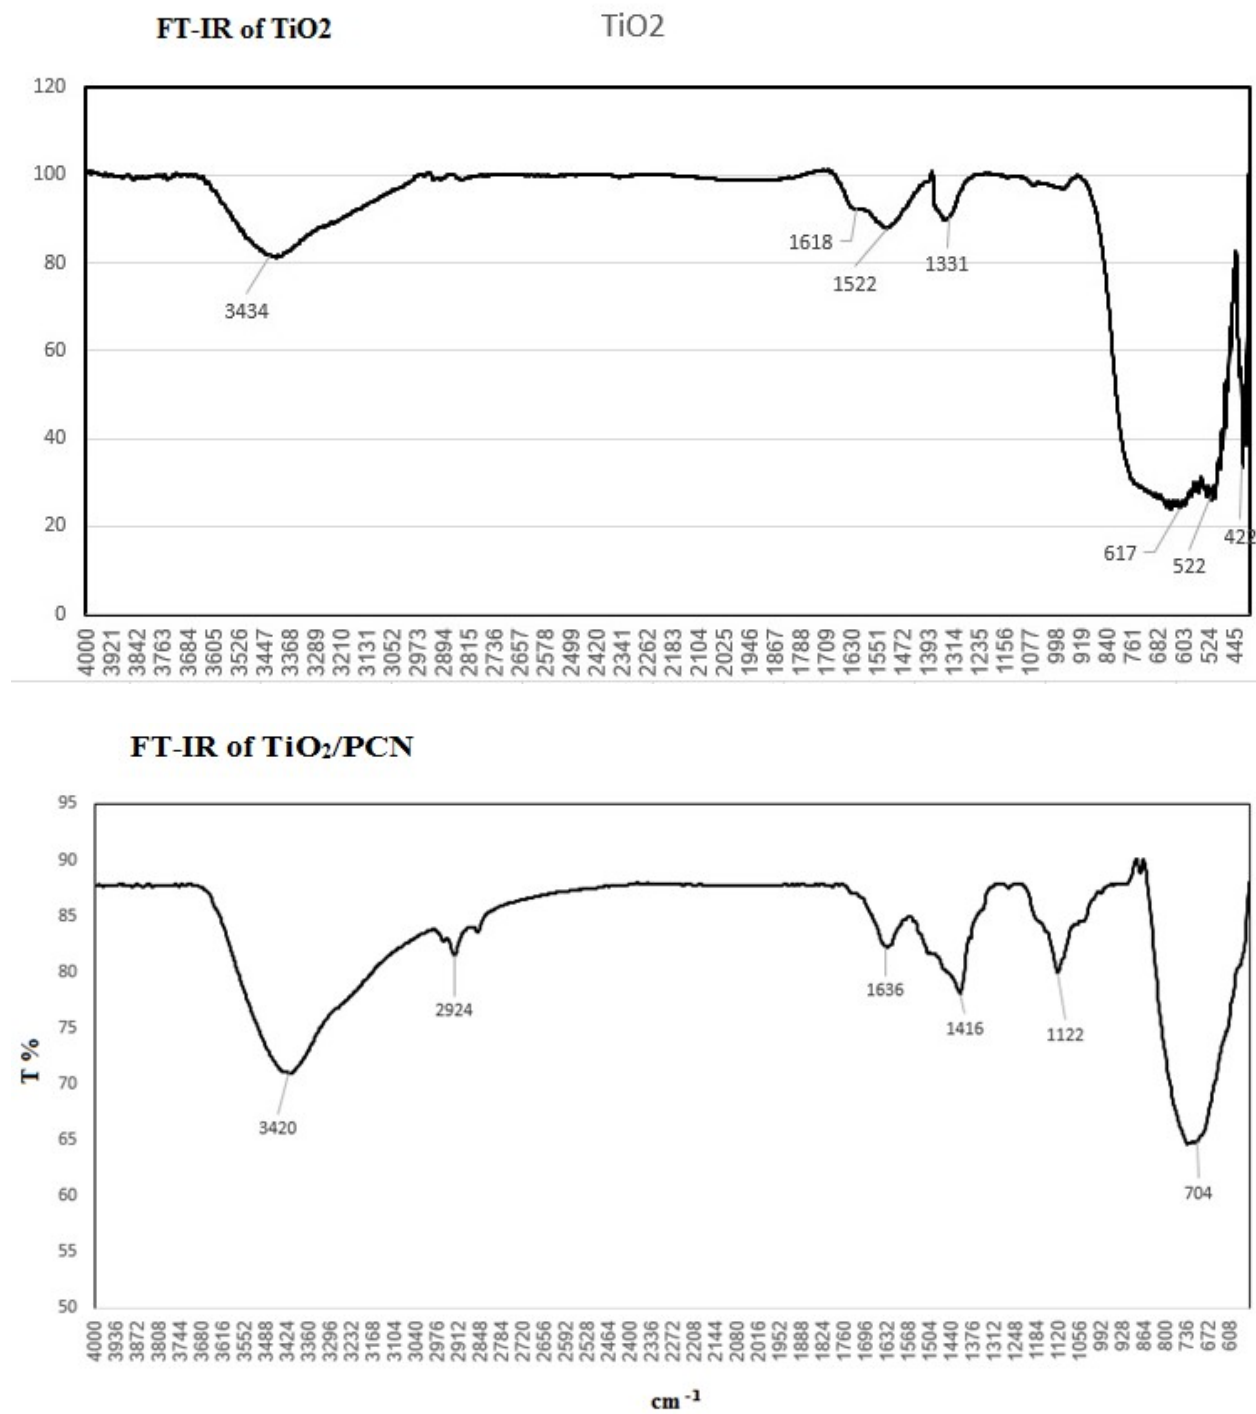

Figure S1. FT-IR spectrum of TiO<sub>2</sub>/PCN in comparison with TiO<sub>2</sub>.

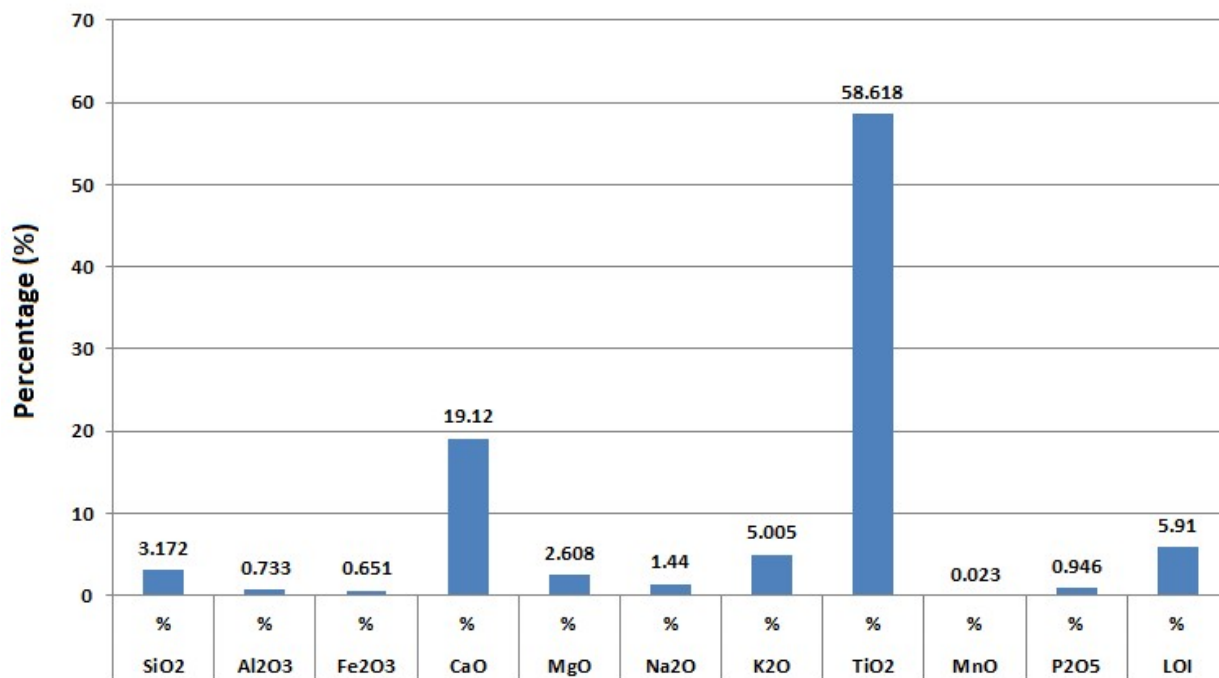

Figure S2. Types of elemental oxides in the nanocomposite structure determined by X-ray fluorescence (XRF) analysis.

### FT-IR of fresh catalyst

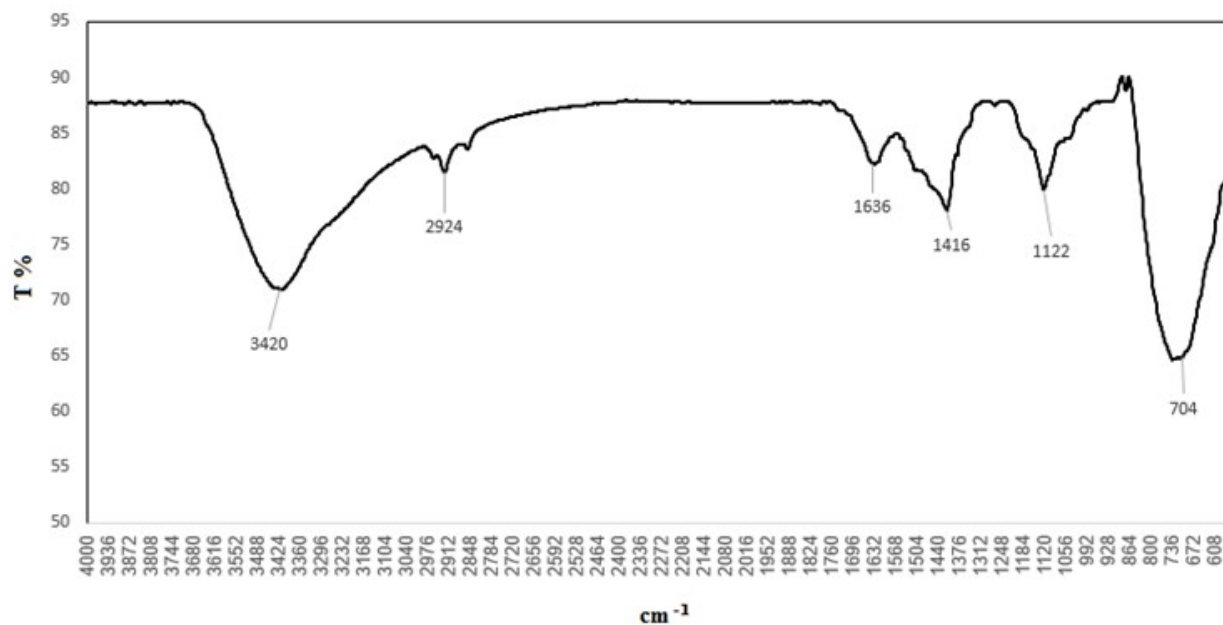

### FT-IR of reused catalyst

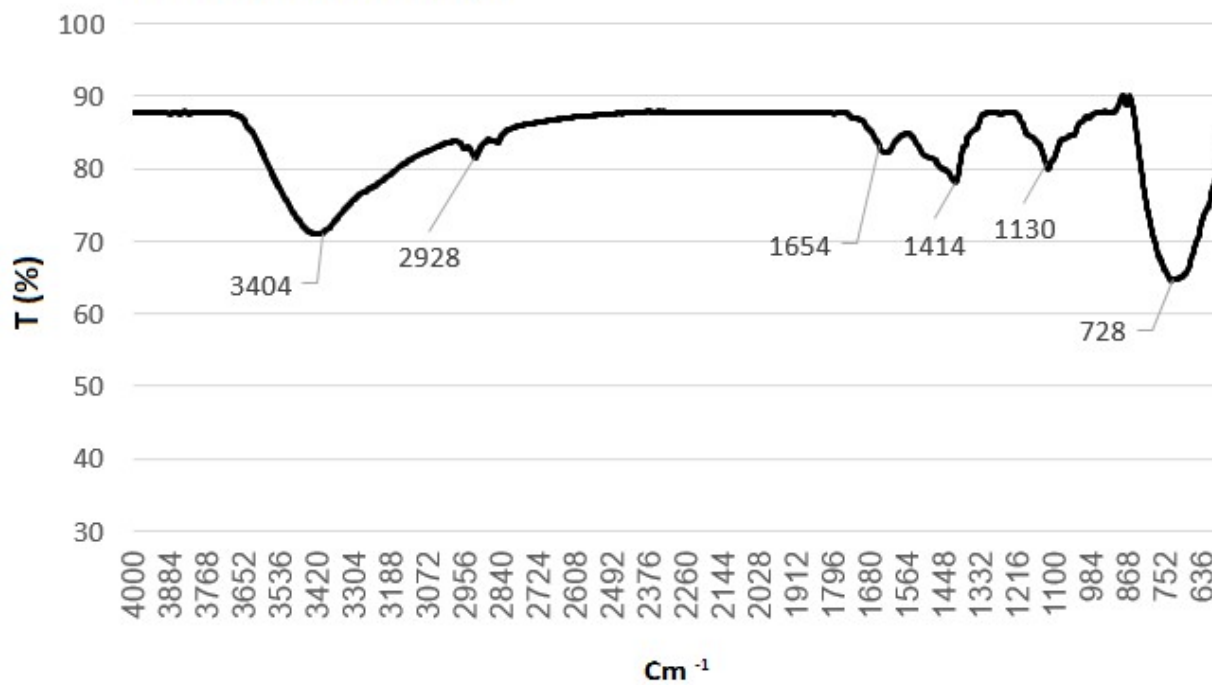

Figure S3. FT-IR spectrum of fresh catalyst in comparison with TiO<sub>2</sub>.

Analyst  
Date

ranjbaran  
Sunday, May 29, 2022 10:57 AM

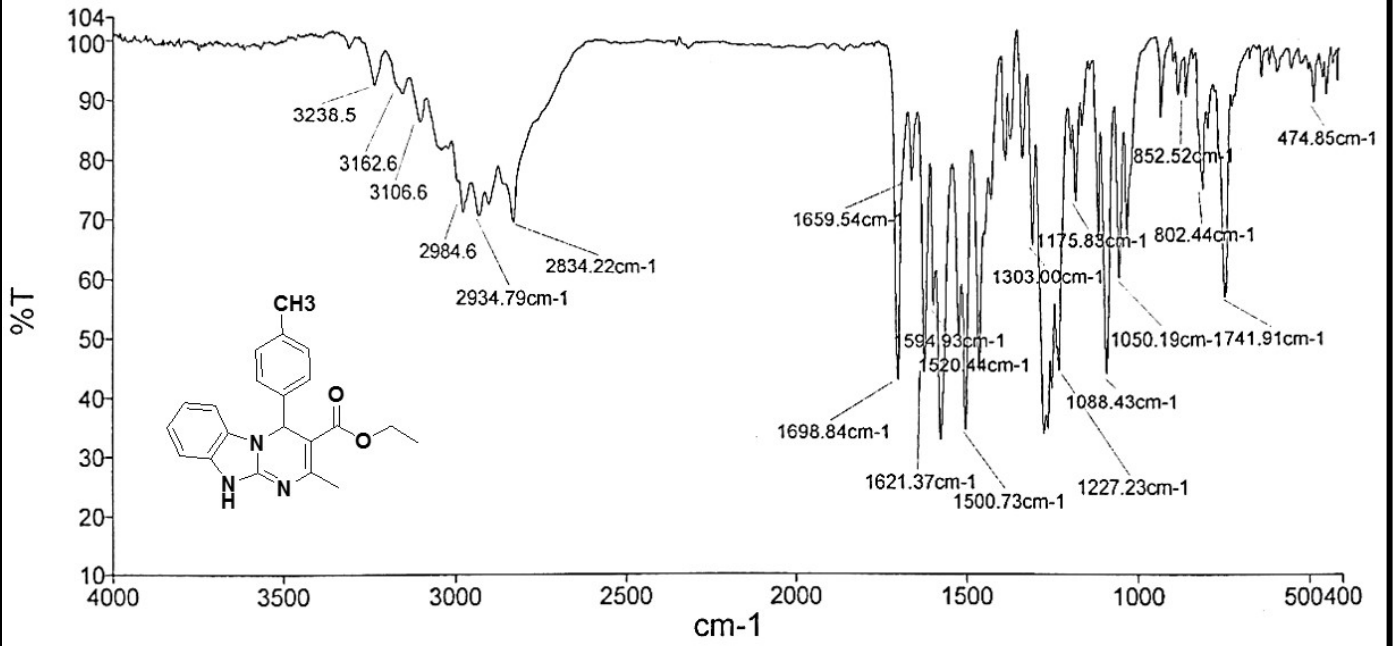



hamedan-5.108.1.1r  
jalilian-3-1400-7-3

Current Data Parameters  
NAME hamedan-5  
EXPNO 108  
PROCNO 1

F2 - Acquisition Parameters  
Date\_ 20200924  
Time 10.21  
INSTRUM spect  
PROBHD 5 mm Multinucl  
PULPROG zg  
TD 16384  
SOLVENT DMSO  
NS 16  
DS 0  
SWH 6265.664 Hz  
FIDRES 0.382426 Hz  
AQ 1.3074932 sec  
RG 32  
DW 79.800 usec  
DE 6.00 usec  
TE 300.0 K  
D1 2.00000000 sec

==== CHANNEL f1  
====  
NUC1 1H  
P1 9.00 usec  
PL1 3.00 dB  
SFO1 250.1320010 MHz

F2 - Processing parameters  
SI 32768  
SF 250.1300000 MHz  
WDW EM  
SSB 0  
LB 1.00 Hz  
GB 0  
PC 1.00

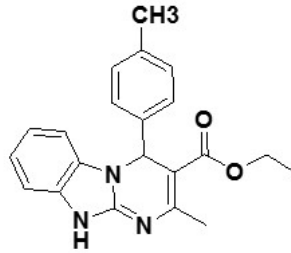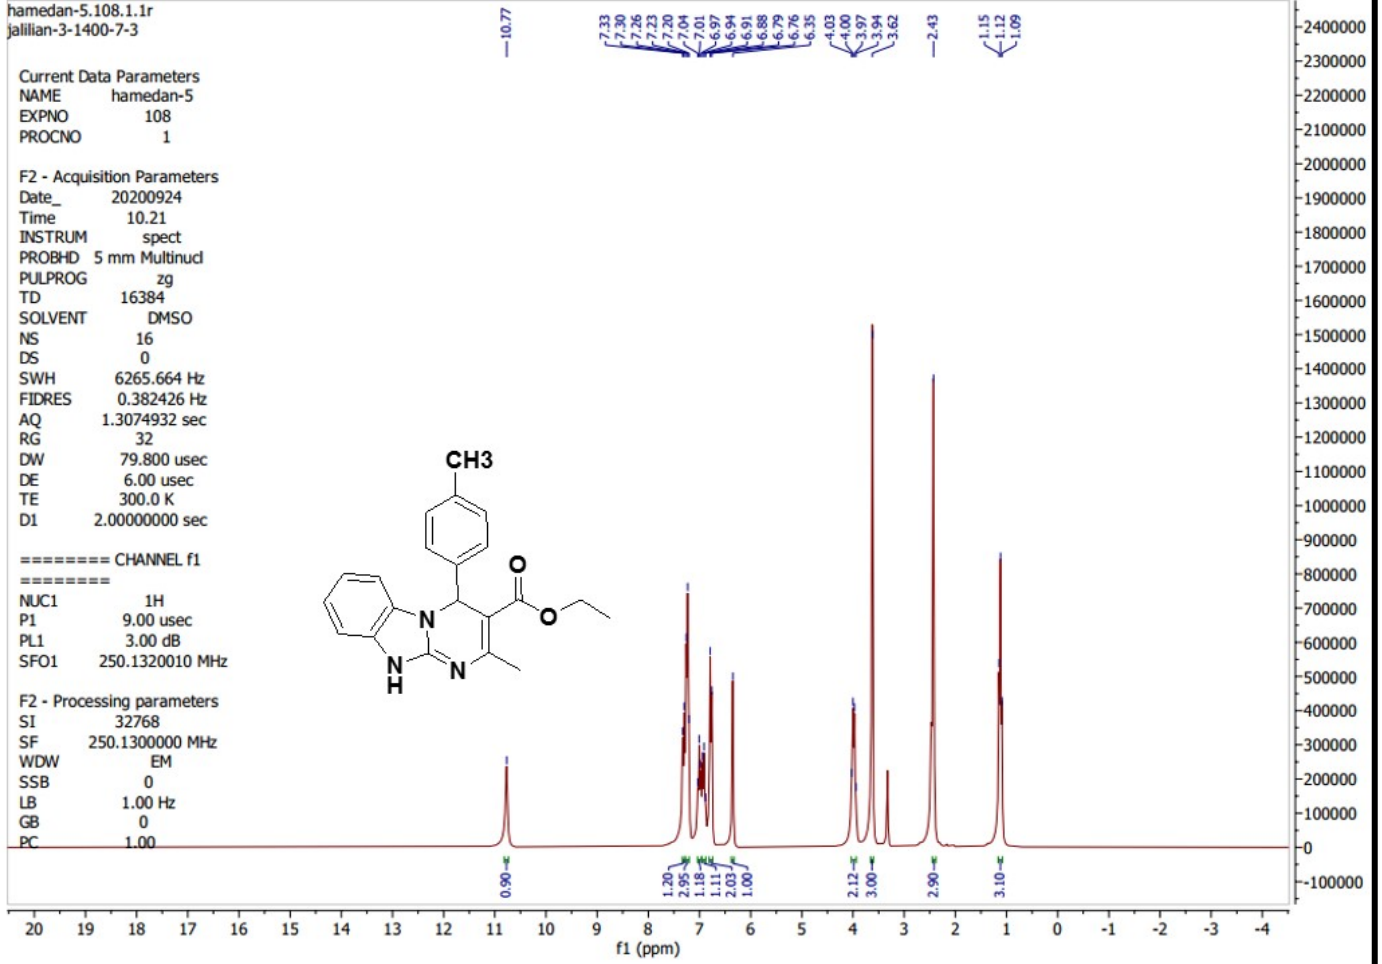

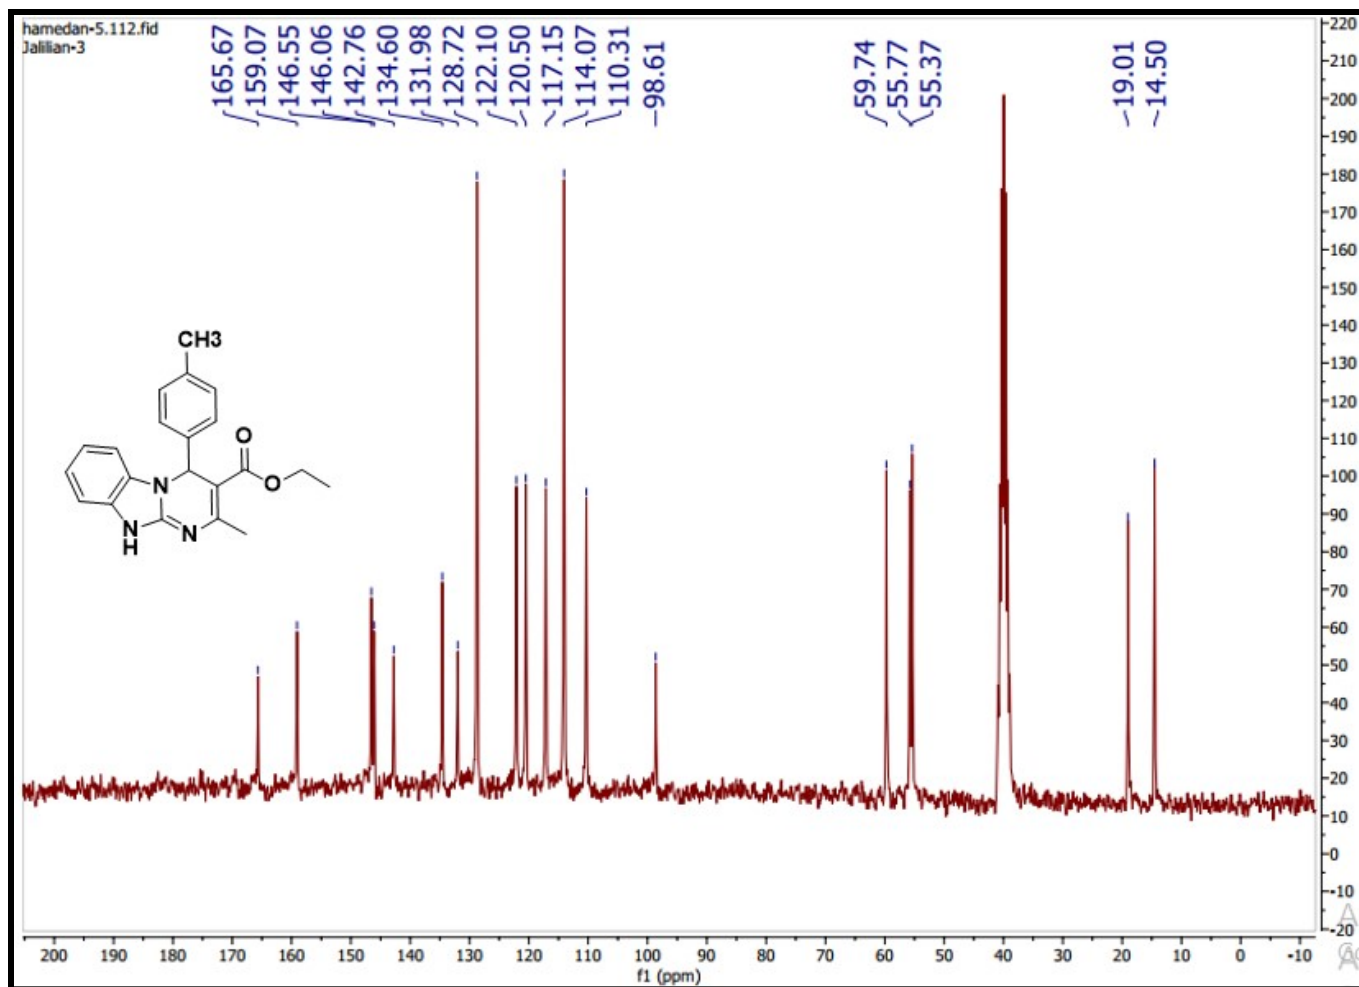

Analyst  
Date

ranjbaran  
Tuesday, May 31, 2022 11:23 AM

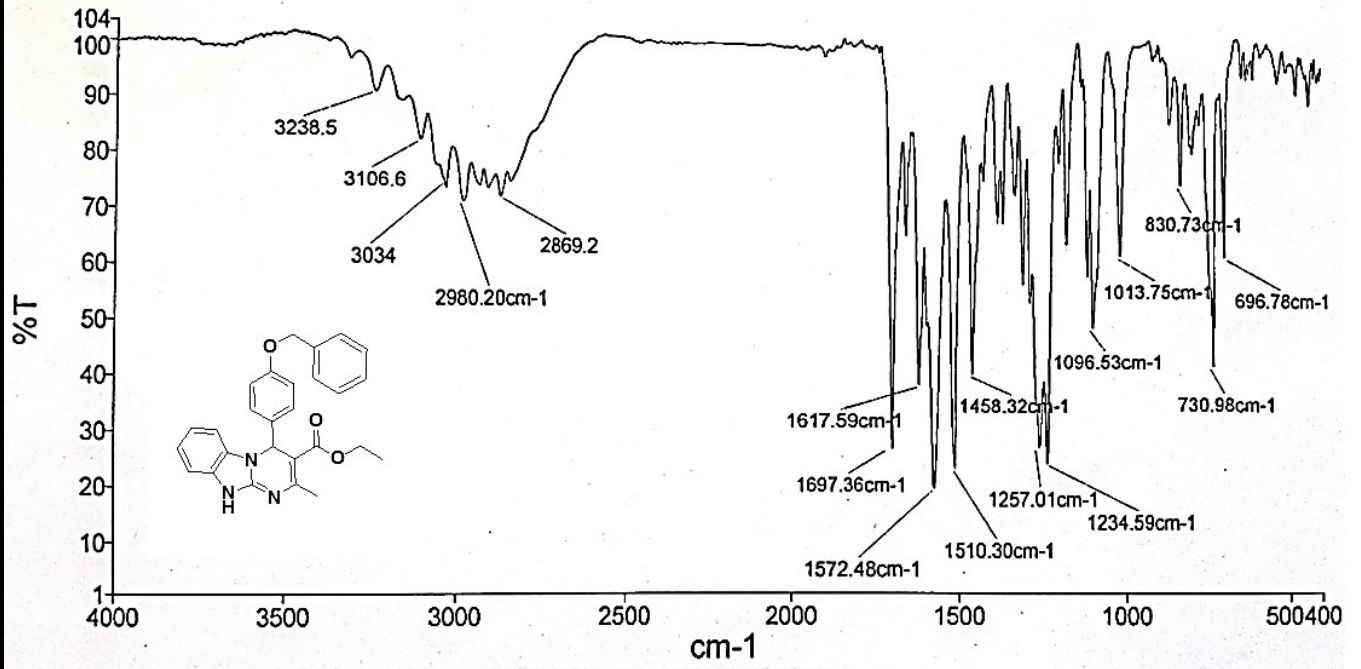

4-Benz Sample 1437 By 14 Date Tuesday, May 31 2022

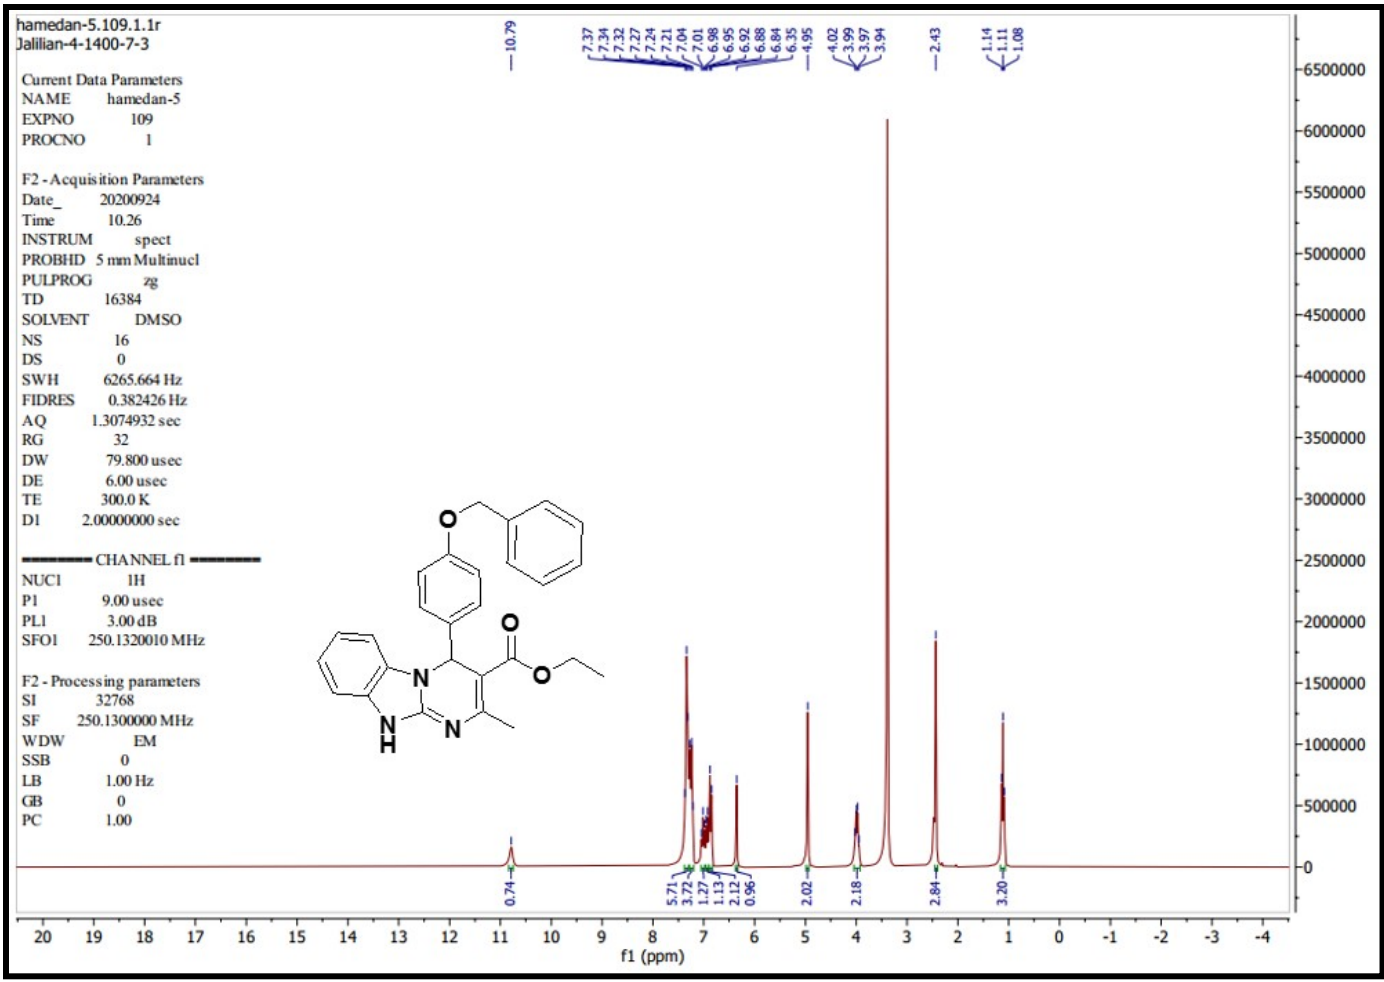

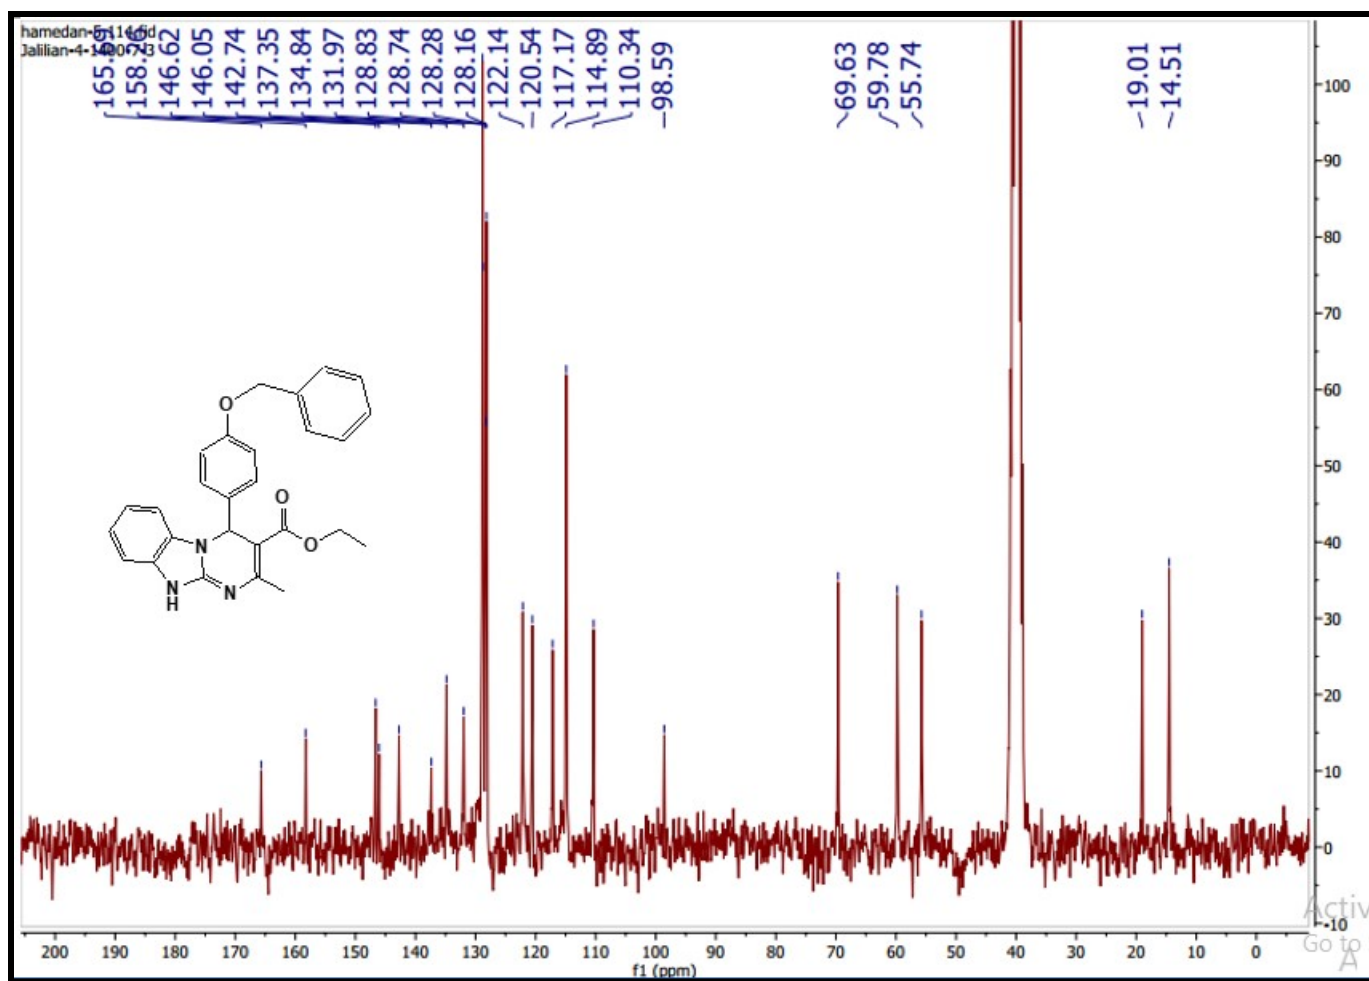

Analyst  
Date

ranjbaran  
Sunday, May 29, 2022 10:51 AM

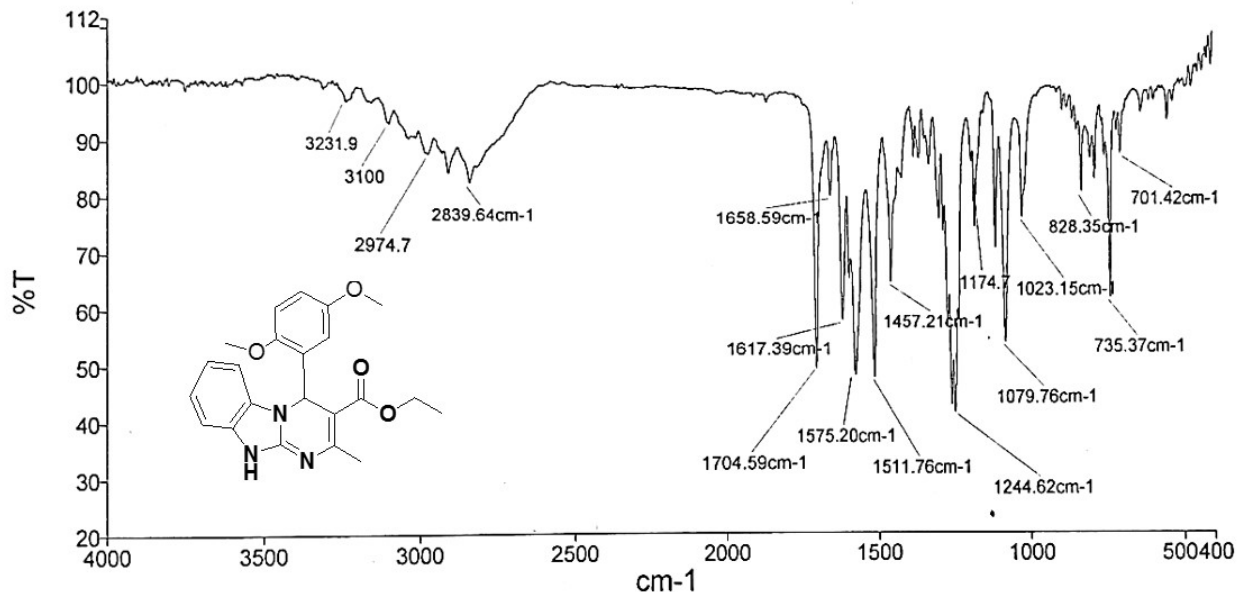

2,5-DiMeO Sample 1414 By 14 Date Sunday, May 29 2022

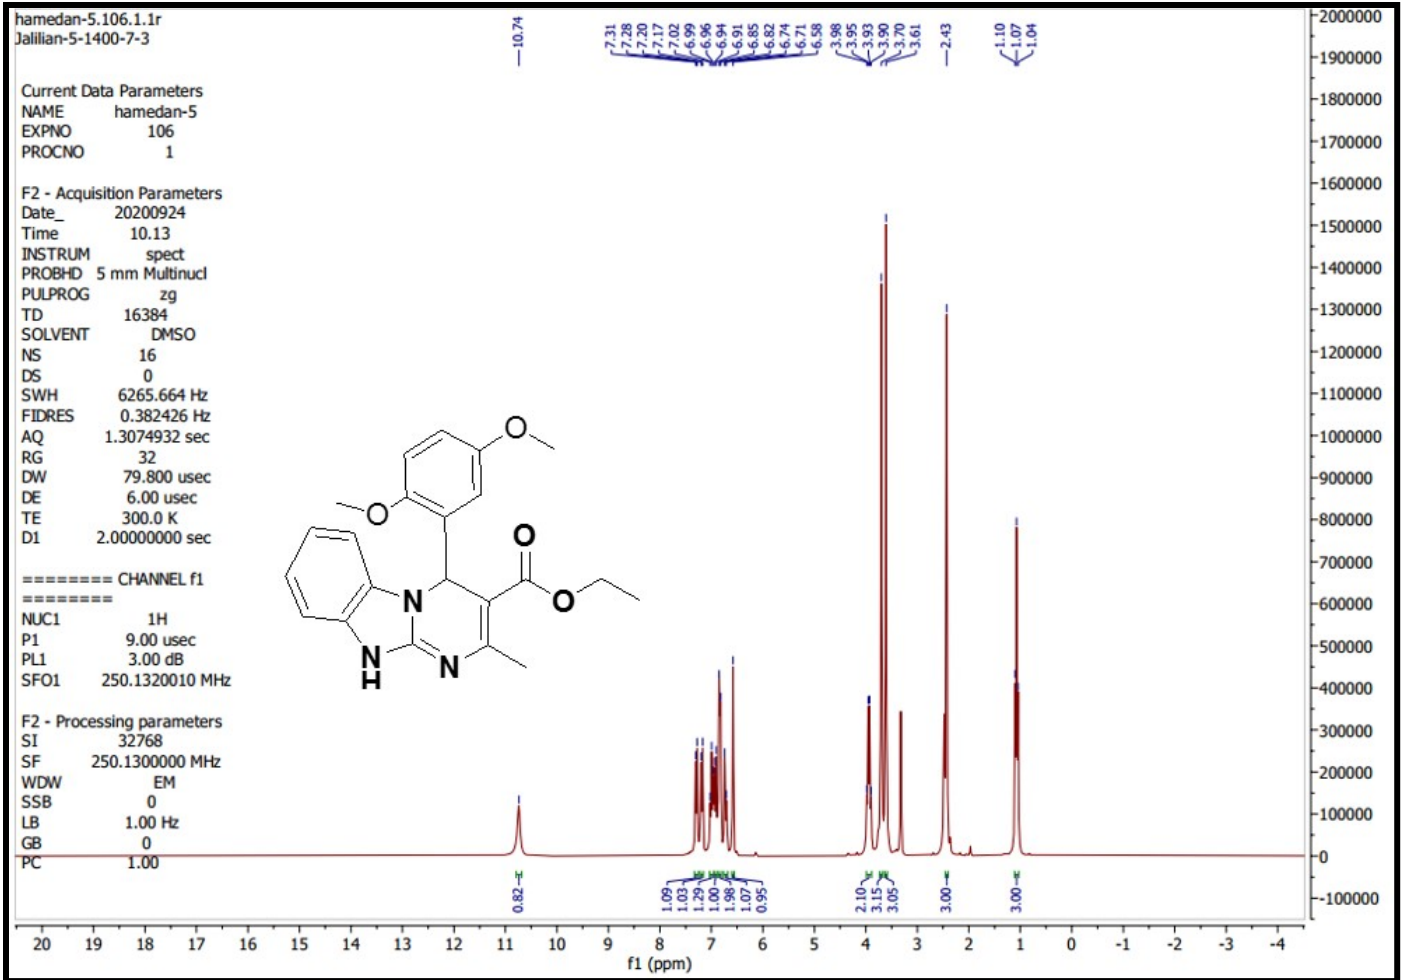

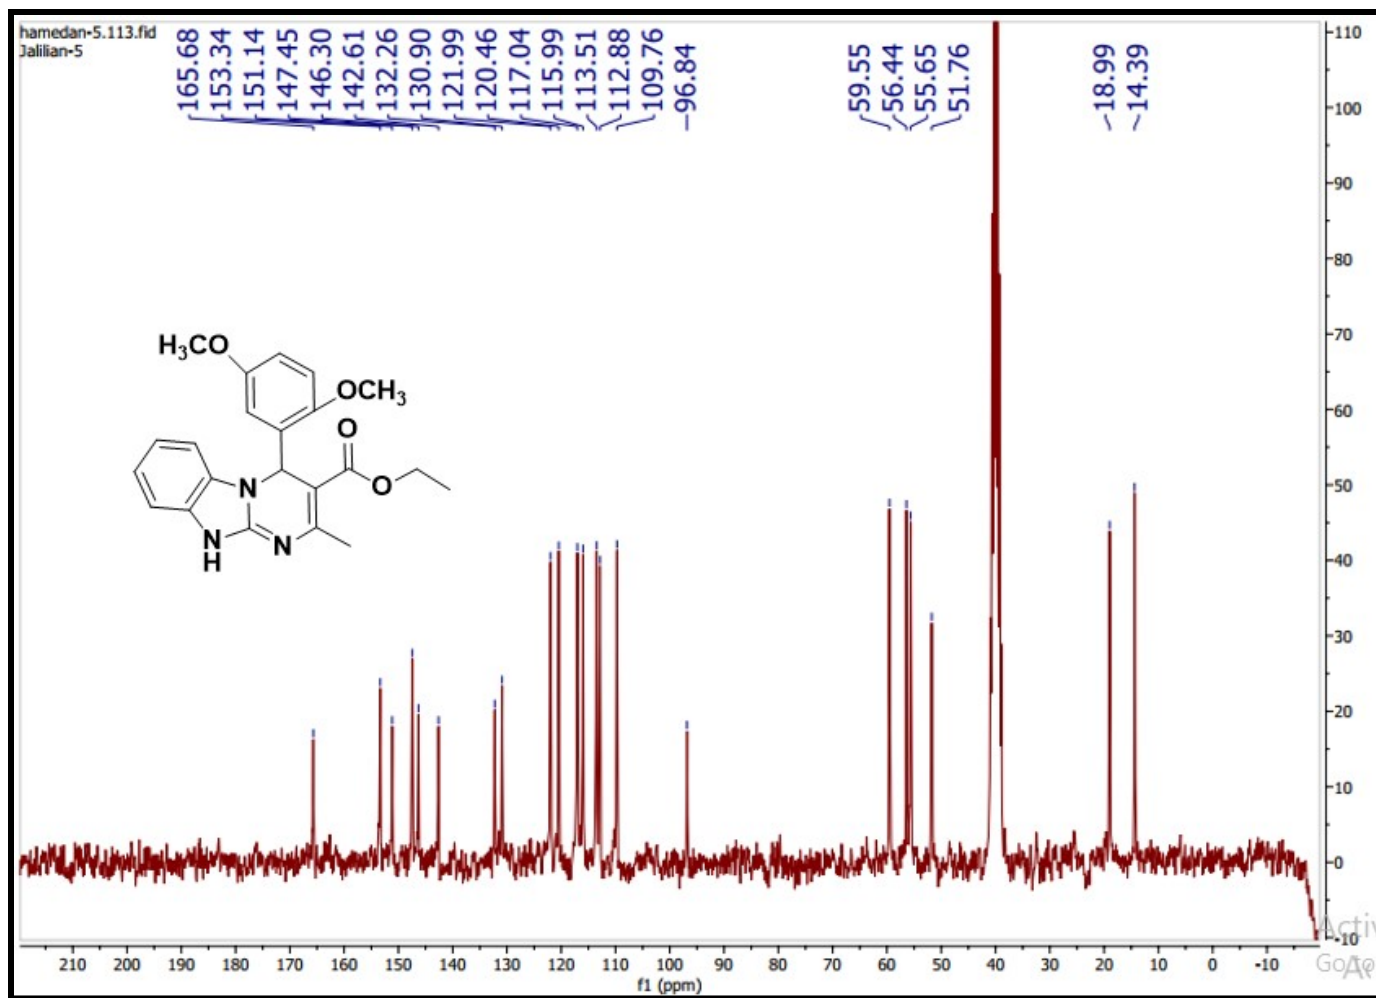



Analyst  
Date

Ranjbaran  
Saturday, January 22, 2022 11:19 AM

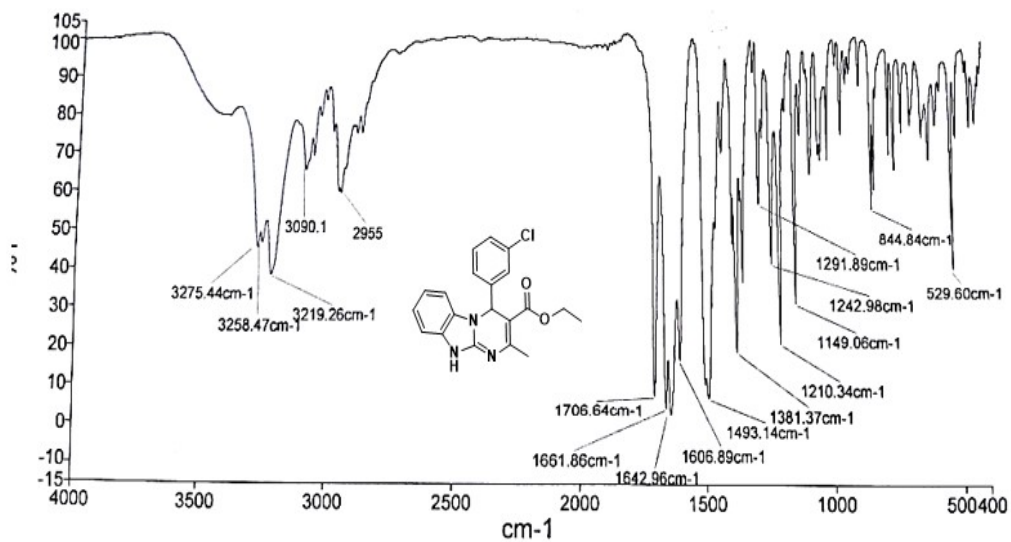

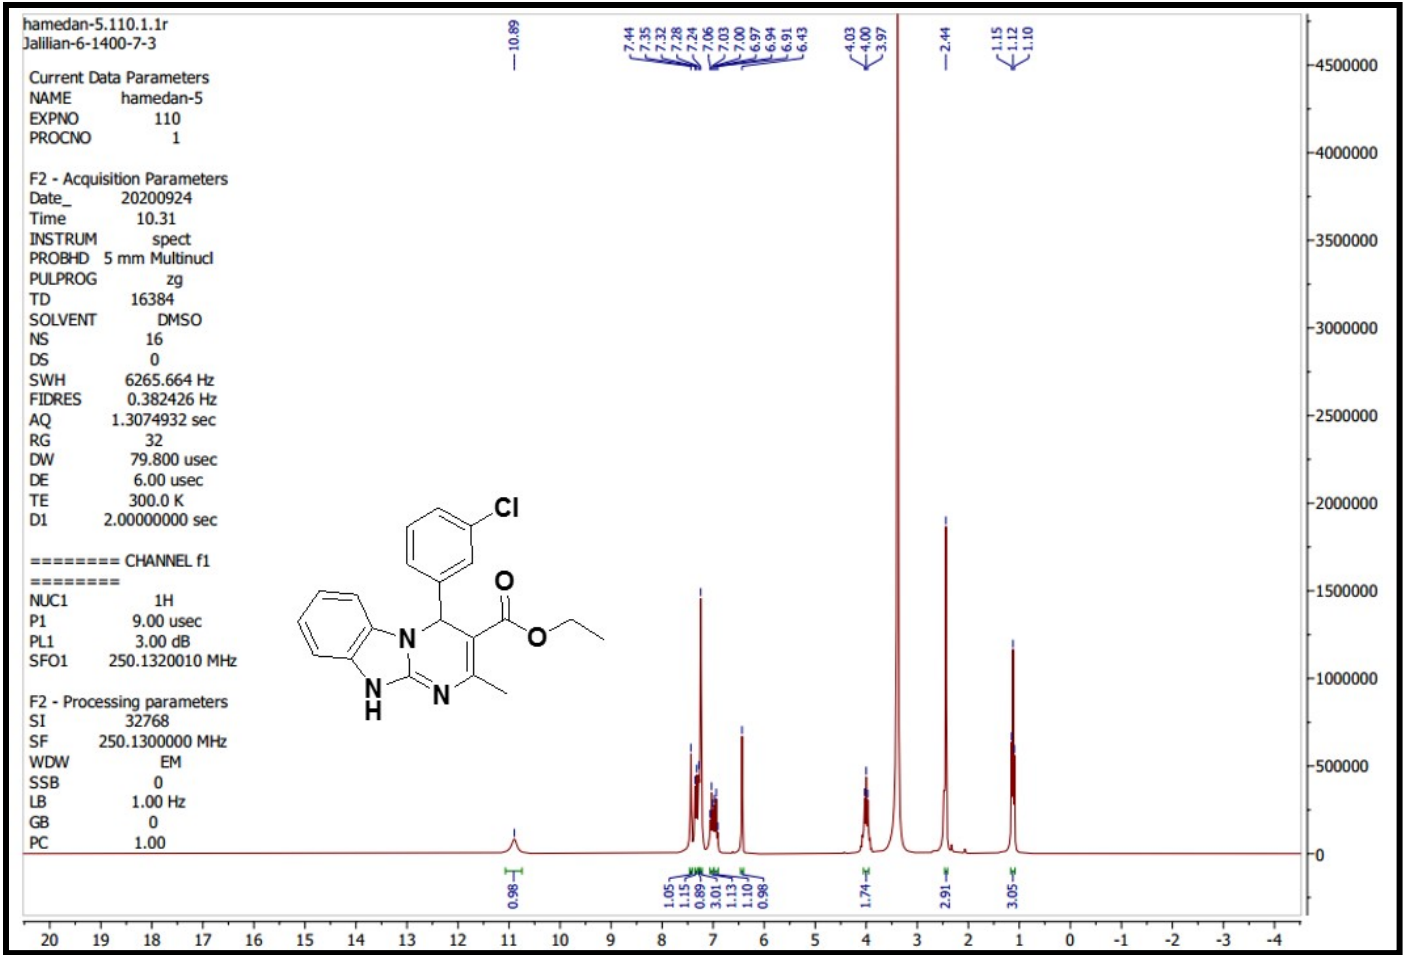

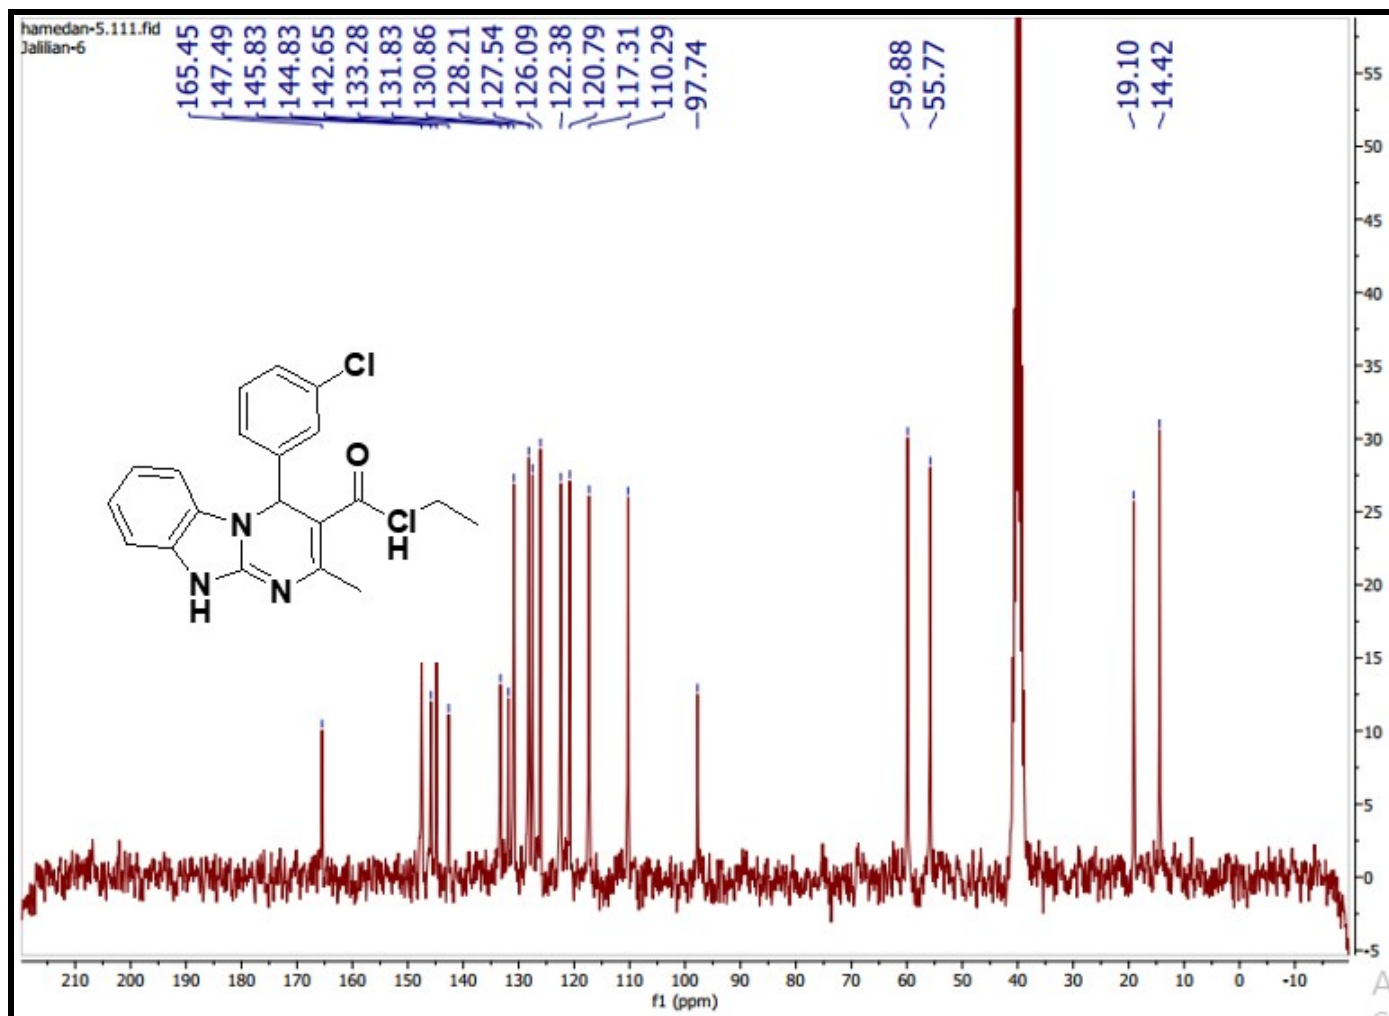

Supplement: d3ra00367a1.pdf [file d3ra00367a1.pdf]
